# Supplementary material for: Dihydroquercetin supplement alleviates colonic inflammation potentially through improved gut microbiota community in mice
Source: Royal Society of Chemistry journal article supplement (doi:10.1039/d1fo01422f), 2021-01-01
Supplement: d1fo01422f1.pdf [file d1fo01422f1.pdf]

## Supporting information

Total ion chromatography (TIC) of DHQ (Supplemental Fig. 1). Effect of DHQ administration on body weight in DSS-induced colitis mice (Supplemental Fig. 2). Curves of the OUT rank-abundance and rarefaction (Supplemental Fig. 3). Indexes of (A) Shannon, (B) Simpson, (C) Ace, (D) Chao, and (E) Sobs. (Supplemental Fig. 4). Effect of DHQ administration on intestinal microbiota community composition characterizing using LDA (Supplemental Fig. 5).

## SUPPLEMENTAL FIGURES

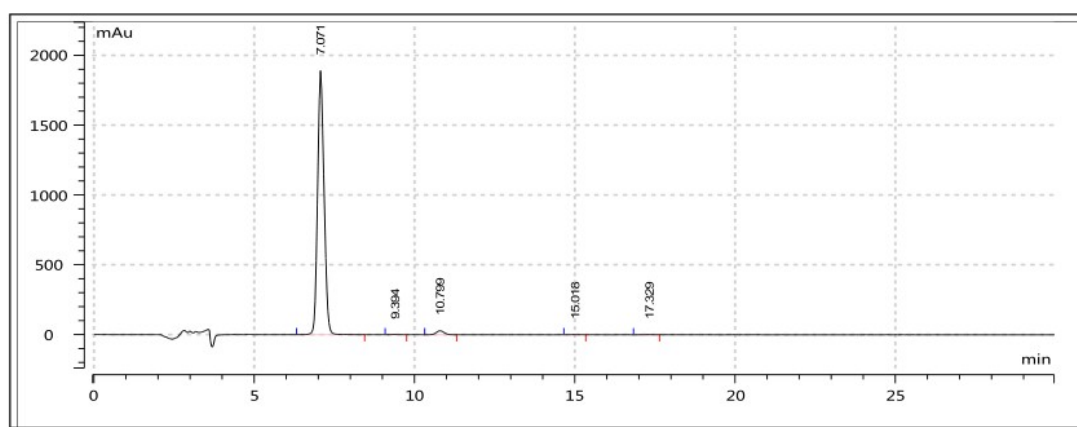

**Figure S1**

Total ion chromatography (TIC) of DHQ.

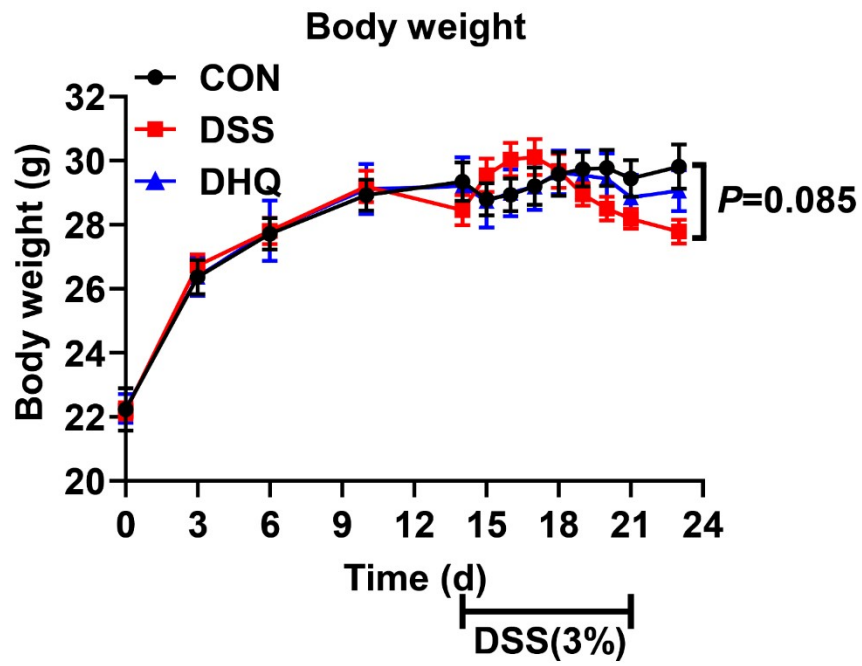

**Figure S2**

Effect of DHQ administration on body weight in DSS-induced colitis mice.

Groups with data mean statistically differ different trend ( $0.05 < P < 0.1$ ).

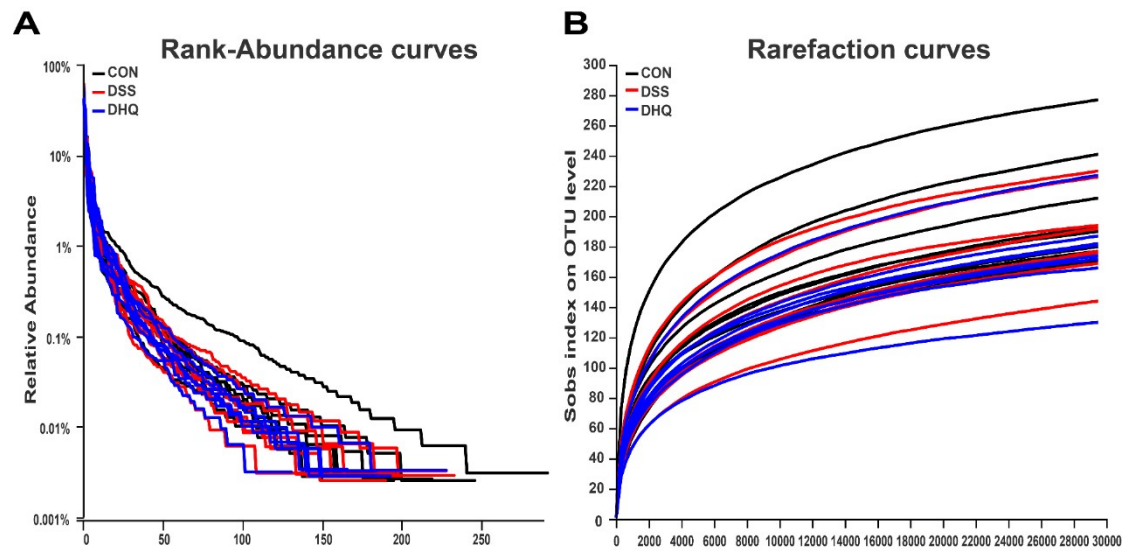

**Figure S3**

Curves of the OUT rank-abundance and rarefaction.

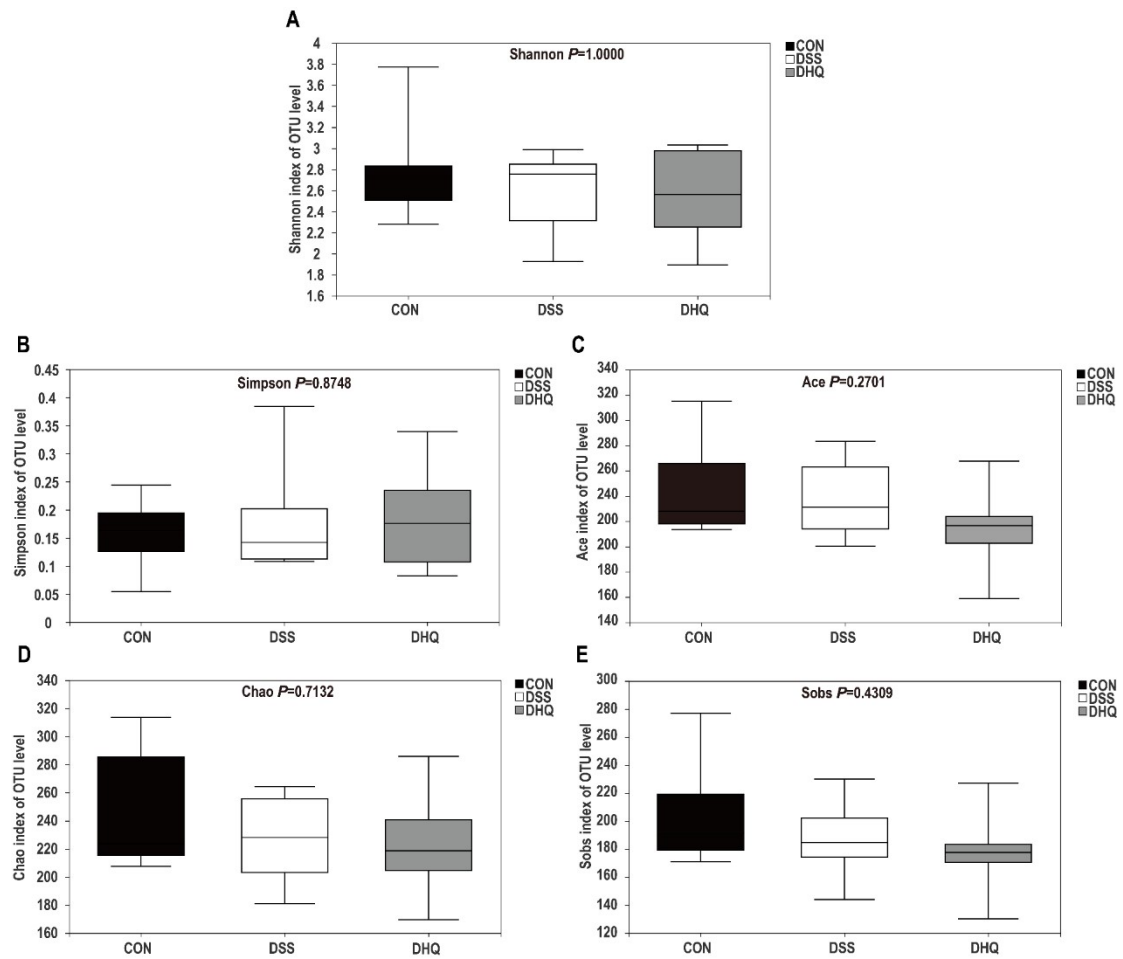

**Figure S4**

Indexes of (A) Shannon. (B) Simpson. (C) Ace. (D) Chao. and (E) Sobs. Data are presented as mean  $\pm$  SEM and statistical significance was determined by Kruskal-Wallis test (H-test) with,  $n=8$ .

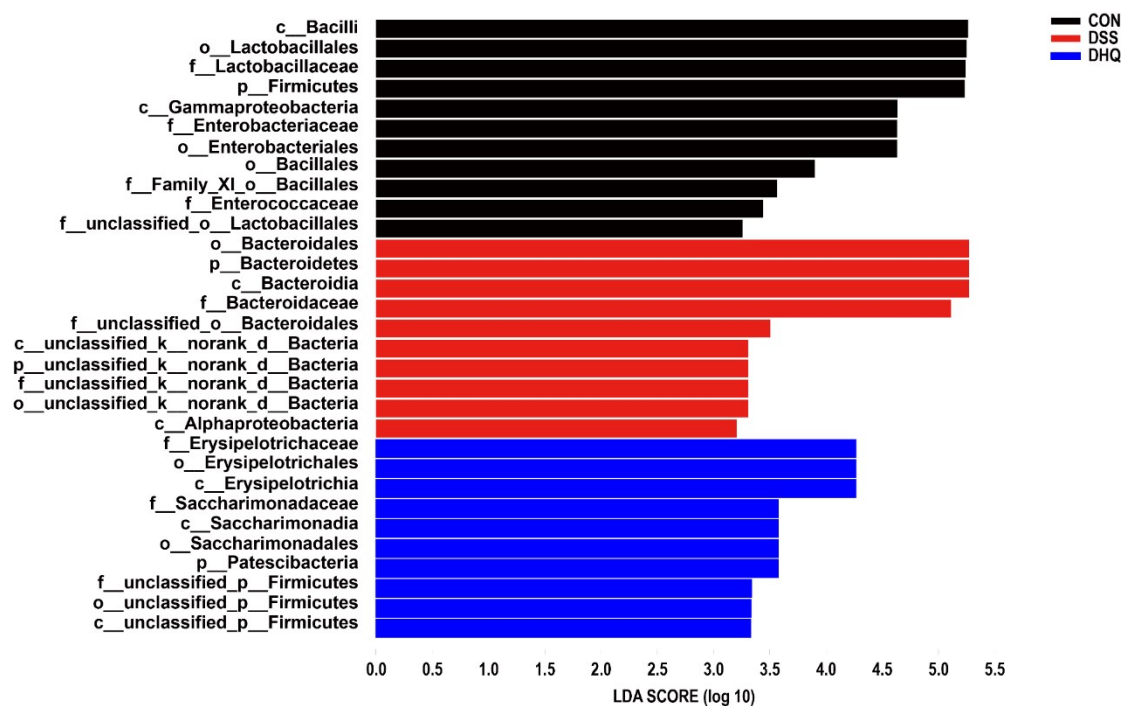

**Figure S5**

Effect of DHQ administration on intestinal microbiota community composition characterizing using LDA.
